# Supplementary material for: ATP-Binding Cassette Subfamily a Member 2 Is a Functional Receptor for Bacillus thuringiensis Cry2A Toxins in Bombyx mori, But Not for Cry1A, Cry1C, Cry1D, Cry1F, or Cry9A Toxins
Source: MDPI journal article supplement (doi:10.3390/toxins12020104), 2020-02-06
Supplement: s1 [file s1]

|       |                                                                                                                                                     |
|-------|-----------------------------------------------------------------------------------------------------------------------------------------------------|
| WT    | GCTGTTCCAATAGTTATGATGAATGCGACGCTGCTGATCGTACAGTTCCTCATTTCGTTGTTGCCAATATC<br>AlaValProIleValMetMetAsnAlaThrLeuLeuIleValGlnPheLeuIleSerPheValAlaAsnIle |
| A2T01 | GCTGTTCCAATAGTTATGATGAATGCGACG-----TAAGCTTTGCCAATATC<br>AlaValProIleValMetMetAsnAlaThrStp                                                           |
| A2T03 | GCTGTTCCAATAGTTATGATGAATGCGA-----TCGTACAGTTCCTCATTTCGTTGTTGCCAATATC<br>AlaValProIleValMetMetAsnAlaIleValGlnPheLeuIleSerPheValAlaAsnIle              |
| A2T06 | GCTGTTCCAATAGTTATGATGAATGC-----TGCTGATCGTACAGTTCCTCATTTCGTTGTTGCCAATATC<br>AlaValProIleValMetMetAsnAlaAspAspArgThrValProHisPheValArgAlaGlnTyr       |
| A2T08 | GCTGTTCCAATAGTTATGATGAATGCG---CTGCTGATCGTACAGTTCCTCATTTCGTTGTTGCCAATATC<br>AlaValProIleValMetMetAsnAlaLeuLeuIleValGlnPheLeuIleSerPheValAlaAsnIle    |
| A2T11 | GCTGTTCCAATAGTTATGATGAATGCG-----CTGATCGTACAGTTCCTCATTTCGTTGTTGCCAATATC<br>AlaValProIleValMetMetAsnAlaLeuIleValGlnPheLeuIleSerPheValAlaAsnIle        |
| A2T14 | GCTGTTCCAATAGTTATGATGAA---ACGCTGCTGATCGTACAGTTCCTCATTTCGTTGTTGCCAATATC<br>AlaValProIleValMetMetLysArgCysStp                                         |

**Figure. S1** Mutations in BmABCA2 in mutant strains produced by genome-editing method using TALENs. The predicted cDNA sequences and their deduced protein sequences from the wild-type (WT) and TALEN mutant strains, showing premature termination of the ABCA2 protein in the mutant strains.
